# Supplementary material
Source: HighWire-hosted journal article supplement (https://bjsm.bmj.com/content/52/17/1130)
Supplement: inline-supplementary-material-1 [file inline-supplementary-material-1.docx]

**Supplementary Table 1.** PFP items generated and the KOOS items they were mapped to.

| **PFP items** | **KOOS item** |
| --- | --- |
| ***Pain*** |  |
| Pain up stairs or slopes | P6. Pain going up or down stairs |
| Pain down stairs or slopes |
| Pain during prolonged walking (>40 mins) | P5. Pain with walking on flat surface |
| Pain with prolonged standing | P9. Pain standing upright |
| Pain with sitting (including prolonged) or driving | P8. Pain with sitting or lying |
| Pain at rest (lying) | P7. Pain at night while in bed |
| Pain at night while in bed |
| Pain disturbs sleep |
| Constant pain | P1. How often do you experience pain |
| ***Activities of Daily Living*** |  |
| Difficulty with household activities | A16. Heavy domestic duties |
|  | A17. Light domestic duties |
| Difficulty with stairs | A1. Descending stairs |
| Difficulty/modification stairs/slopes | A2. Ascending stairs |
| Difficulty rising from low chair (toilet) | A3. Rising from sitting |
|  | A15. Getting on and off the toilet |
| Getting in and out of car | A7. Getting in and out of car |
| Difficulty with sitting / kneeling | A14. Sitting |
| ***Symptoms*** |  |
| Crepitus | S4. Grinding, clicking etc. |
| Locking sensation (i.e. from bent to straight) | S5. Does your knee catch or hang up |
| Need to straighten knee after sitting | S6. Straighten your knee fully |
| Inability to fully straighten knee |
| Swelling (especially after activities) | S3. Swelling |
| ***Sport and Recreation*** |  |
| Inability to run | SP2. Running |
| Difficulty with kneeling | SP5. Kneeling |
| Difficulty with squatting | SP1. Squatting |
| ***Quality of life*** |  |
| Knee collapse sensation when NOT twisting | Q3. How much are you troubled with lack of confidence in your knee |
| Cautious about activities (fear of movement) |
| Discontinuation of family activities | Q2. Have you modified your lifestyle to avoid potentially damaging activities to your knee |
| Severe restriction of normal mobility |
| Limiting holiday |
| Use car more |
| Need to be careful of shoe type |
| Can't wear high heels |
| Modify movements- avoid painful activities |
| Modified walking patterns |
