# Supplementary material
Source: HighWire-hosted journal article supplement (https://bjsm.bmj.com/content/52/17/1130)
Supplement: inline-supplementary-material-2 [file inline-supplementary-material-2.docx]

**Supplementary Table 2.** **Factor loadings for new subscale items. Note blanks represent factor loadings that are less than 0.30.**

| **Variable** | **Factor 1** | **Factor 2** |
| --- | --- | --- |
| PF01 | 0.4209 |  |
| PF02 | 0.5049 |  |
| PF03 | 0.5307 | 0.3471 |
| PF04 | 0.6098 |  |
| PF05 | 0.7237 | -0.3321 |
| PF06 | 0.7445 | -0.3476 |
| PF07 | 0.6940 |  |
| PF08 | 0.7494 |  |
| PF09 | 0.6174 | 0.3715 |
| PF10 | 0.6327 |  |
| PF11 | 0.5485 | 0.3300 |
