# Supplementary material
Source: HighWire-hosted journal article supplement (https://bjsm.bmj.com/content/52/17/1130)
Supplement: inline-supplementary-material-3 [file inline-supplementary-material-3.docx]

*Alternate forms reliability*

Alternate forms reliability was conducted to determine if two different formats of the questionnaire (paper and online) were equivalent. A subset of 29 participants from the University of Queensland completed the KOOS-PF subscale in a paper format as well as in an online format (Survey Monkey) approximately 3 days apart.

We evaluated Bland-Altman plots to confirm homoscedasticity62. Following this, repeated measures analysis of variance (ANOVA) examined systematic differences between the two formats. Finally, we used ICC (3,1) absolute agreement to evaluate reliability63, with values ≥0.7 considered adequate58 67.

Alternate forms reliability was excellent, with an ICC (3,1) of 0.91[CI 0.81, 0.96].
